# Supplementary material for: Exploring the origin of the anomeric relationships in 2-cyanooxane, 2-cyanothiane, 2-cyanoselenane and their corresponding isocyano isomers. Correlations between hyper-conjugative anomeric effect, hardness and electrostatic interactions
Source: Royal Society of Chemistry journal article supplement (doi:10.1039/c6ra06080c), 2016-01-01
Supplement: c6ra06080c1.pdf [file c6ra06080c1.pdf]

## Supplementary Information

**Exploring the origin of the anomeric relationships in 2-cyanooxane, 2-cyanothiane, 2-cyanoselenane and their iso-cyano isomers. Correlations between hyper-conjugative anomeric effect, hardness and electrostatic interactions**

Peyvand Ghanbarpour and Davood Nori-Shargh\*

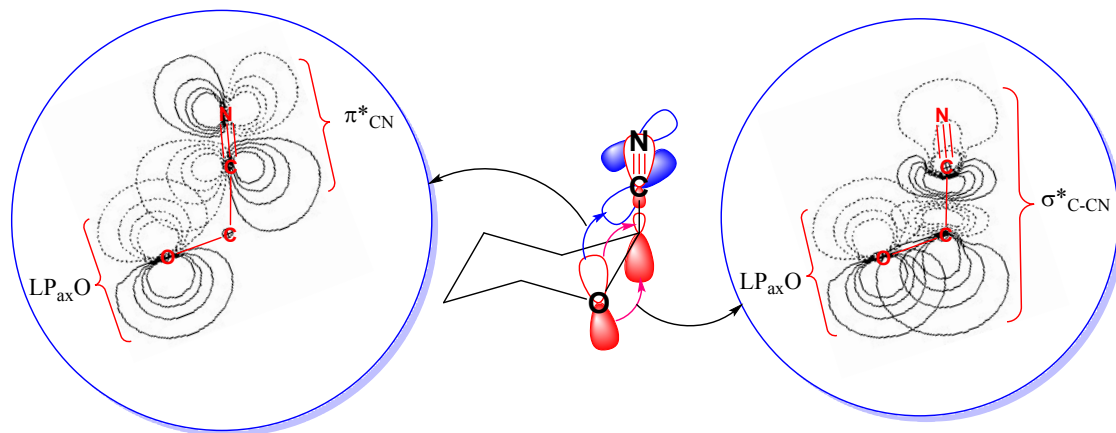

*Through-space:*  $LP_{ax}O_1 \rightarrow \pi^*_{C\equiv N}$

$\ll$

*Through-bond:*  $LP_{ax}O_1 \rightarrow \sigma^*_{C2-C\equiv N}$

**Table SI-1.** B3LYP/6-311+G\*\*, LC- $\omega$ PBE/6-311+G\*\*(a), LC-BLYP/6-311+G\*\*(b), M06-2X/6-311+G\*\*(c) and MP2/6-311+G\*\*(d) calculated structural parameters for the axial and equatorial conformations of compounds **1-6**.

| Geometry         | <b>1</b>                                                                                              |                                                                                                       | <b>2</b>                                                                                                                        |                                                                                                       | <b>3</b>                                                                                                                        |                                                                                                       | <b>4</b>                                                                                              |                                                                                                       | <b>5</b>                                                                                              |                                                                                                       | <b>6</b>                                                                                              |                                                                                                       |
|------------------|-------------------------------------------------------------------------------------------------------|-------------------------------------------------------------------------------------------------------|---------------------------------------------------------------------------------------------------------------------------------|-------------------------------------------------------------------------------------------------------|---------------------------------------------------------------------------------------------------------------------------------|-------------------------------------------------------------------------------------------------------|-------------------------------------------------------------------------------------------------------|-------------------------------------------------------------------------------------------------------|-------------------------------------------------------------------------------------------------------|-------------------------------------------------------------------------------------------------------|-------------------------------------------------------------------------------------------------------|-------------------------------------------------------------------------------------------------------|
|                  | <i>ax</i>                                                                                             | <i>eq</i>                                                                                             | <i>ax</i>                                                                                                                       | <i>eq</i>                                                                                             | <i>ax</i>                                                                                                                       | <i>eq</i>                                                                                             | <i>ax</i>                                                                                             | <i>eq</i>                                                                                             | <i>ax</i>                                                                                             | <i>eq</i>                                                                                             | <i>ax</i>                                                                                             | <i>eq</i>                                                                                             |
| Bond lengths (Å) |                                                                                                       |                                                                                                       |                                                                                                                                 |                                                                                                       |                                                                                                                                 |                                                                                                       |                                                                                                       |                                                                                                       |                                                                                                       |                                                                                                       |                                                                                                       |                                                                                                       |
| $r_{1-2}$        | 1.419<br>(1.403) <sup>a</sup><br>(1.398) <sup>b</sup><br>(1.406) <sup>c</sup><br>(1.417) <sup>d</sup> | 1.422<br>(1.406) <sup>a</sup><br>(1.400) <sup>b</sup><br>(1.409) <sup>c</sup><br>(1.419) <sup>d</sup> | 1.851<br>(1.812) <sup>a</sup><br>(1.808) <sup>b</sup><br>(1.830) <sup>c</sup><br>(1.824) <sup>d</sup><br>(1.815±1) <sup>e</sup> | 1.857<br>(1.817) <sup>a</sup><br>(1.813) <sup>b</sup><br>(1.835) <sup>c</sup><br>(1.828) <sup>d</sup> | 2.003<br>(1.949) <sup>a</sup><br>(1.944) <sup>b</sup><br>(1.975) <sup>c</sup><br>(1.977) <sup>d</sup><br>(1.953±4) <sup>e</sup> | 2.009<br>(1.954) <sup>a</sup><br>(1.949) <sup>b</sup><br>(1.980) <sup>c</sup><br>(1.980) <sup>d</sup> | 1.404<br>(1.391) <sup>a</sup><br>(1.386) <sup>b</sup><br>(1.394) <sup>c</sup><br>(1.401) <sup>d</sup> | 1.415<br>(1.401) <sup>a</sup><br>(1.394) <sup>b</sup><br>(1.404) <sup>c</sup><br>(1.410) <sup>d</sup> | 1.843<br>(1.806) <sup>a</sup><br>(1.802) <sup>b</sup><br>(1.825) <sup>c</sup><br>(1.815) <sup>d</sup> | 1.856<br>(1.817) <sup>a</sup><br>(1.813) <sup>b</sup><br>(1.836) <sup>c</sup><br>(1.826) <sup>d</sup> | 1.997<br>(1.944) <sup>a</sup><br>(1.939) <sup>b</sup><br>(1.972) <sup>c</sup><br>(1.971) <sup>d</sup> | 2.007<br>(1.954) <sup>a</sup><br>(1.947) <sup>b</sup><br>(1.980) <sup>c</sup><br>(1.978) <sup>d</sup> |
| $r_{2-3}$        | 1.541<br>(1.527) <sup>a</sup><br>(1.520) <sup>b</sup><br>(1.534) <sup>c</sup><br>(1.533) <sup>d</sup> | 1.540<br>(1.525) <sup>a</sup><br>(1.519) <sup>b</sup><br>(1.532) <sup>c</sup><br>(1.532) <sup>d</sup> | 1.544<br>(1.530) <sup>a</sup><br>(1.525) <sup>b</sup><br>(1.537) <sup>c</sup><br>(1.538) <sup>d</sup><br>(1.534±2) <sup>e</sup> | 1.542<br>(1.529) <sup>a</sup><br>(1.523) <sup>b</sup><br>(1.535) <sup>c</sup><br>(1.536) <sup>d</sup> | 1.542<br>(1.530) <sup>a</sup><br>(1.524) <sup>b</sup><br>(1.537) <sup>c</sup><br>(1.538) <sup>d</sup><br>(1.536±6) <sup>e</sup> | 1.540<br>(1.528) <sup>a</sup><br>(1.522) <sup>b</sup><br>(1.534) <sup>c</sup><br>(1.535) <sup>d</sup> | 1.536<br>(1.523) <sup>a</sup><br>(1.516) <sup>b</sup><br>(1.529) <sup>c</sup><br>(1.529) <sup>d</sup> | 1.533<br>(1.520) <sup>a</sup><br>(1.514) <sup>b</sup><br>(1.526) <sup>c</sup><br>(1.526) <sup>d</sup> | 1.538<br>(1.526) <sup>a</sup><br>(1.520) <sup>b</sup><br>(1.532) <sup>c</sup><br>(1.533) <sup>d</sup> | 1.534<br>(1.522) <sup>a</sup><br>(1.516) <sup>b</sup><br>(1.527) <sup>c</sup><br>(1.528) <sup>d</sup> | 1.536<br>(1.525) <sup>a</sup><br>(1.520) <sup>b</sup><br>(1.531) <sup>c</sup><br>(1.533) <sup>d</sup> | 1.532<br>(1.521) <sup>a</sup><br>(1.515) <sup>b</sup><br>(1.526) <sup>c</sup><br>(1.528) <sup>d</sup> |
| $r_{3-4}$        | 1.534<br>(1.522) <sup>a</sup><br>(1.517) <sup>b</sup><br>(1.529) <sup>c</sup><br>(1.530) <sup>d</sup> | 1.535<br>(1.523) <sup>a</sup><br>(1.517) <sup>b</sup><br>(1.530) <sup>c</sup><br>(1.531) <sup>d</sup> | 1.534<br>(1.523) <sup>a</sup><br>(1.518) <sup>b</sup><br>(1.529) <sup>c</sup><br>(1.531) <sup>d</sup><br>(1.526±2) <sup>e</sup> | 1.534<br>(1.523) <sup>a</sup><br>(1.517) <sup>b</sup><br>(1.529) <sup>c</sup><br>(1.531) <sup>d</sup> | 1.535<br>(1.524) <sup>a</sup><br>(1.519) <sup>b</sup><br>(1.530) <sup>c</sup><br>(1.531) <sup>d</sup><br>(1.522±7) <sup>e</sup> | 1.535<br>(1.523) <sup>a</sup><br>(1.517) <sup>b</sup><br>(1.529) <sup>c</sup><br>(1.532) <sup>d</sup> | 1.533<br>(1.522) <sup>a</sup><br>(1.516) <sup>b</sup><br>(1.528) <sup>c</sup><br>(1.530) <sup>d</sup> | 1.535<br>(1.523) <sup>a</sup><br>(1.518) <sup>b</sup><br>(1.530) <sup>c</sup><br>(1.531) <sup>d</sup> | 1.534<br>(1.523) <sup>a</sup><br>(1.517) <sup>b</sup><br>(1.529) <sup>c</sup><br>(1.530) <sup>d</sup> | 1.535<br>(1.523) <sup>a</sup><br>(1.518) <sup>b</sup><br>(1.529) <sup>c</sup><br>(1.531) <sup>d</sup> | 1.535<br>(1.523) <sup>a</sup><br>(1.518) <sup>b</sup><br>(1.529) <sup>c</sup><br>(1.531) <sup>d</sup> | 1.535<br>(1.524) <sup>a</sup><br>(1.518) <sup>b</sup><br>(1.530) <sup>c</sup><br>(1.532) <sup>d</sup> |
| $r_{4-5}$        | 1.535<br>(1.523) <sup>a</sup><br>(1.518) <sup>b</sup><br>(1.530) <sup>c</sup><br>(1.532) <sup>d</sup> | 1.535<br>(1.523) <sup>a</sup><br>(1.518) <sup>b</sup><br>(1.530) <sup>c</sup><br>(1.531) <sup>d</sup> | 1.536<br>(1.524) <sup>a</sup><br>(1.519) <sup>b</sup><br>(1.531) <sup>c</sup><br>(1.532) <sup>d</sup><br>(1.517±2) <sup>e</sup> | 1.534<br>(1.523) <sup>a</sup><br>(1.518) <sup>b</sup><br>(1.530) <sup>c</sup><br>(1.530) <sup>d</sup> | 1.536<br>(1.525) <sup>a</sup><br>(1.519) <sup>b</sup><br>(1.531) <sup>c</sup><br>(1.533) <sup>d</sup><br>(1.530±7) <sup>e</sup> | 1.535<br>(1.524) <sup>a</sup><br>(1.518) <sup>b</sup><br>(1.530) <sup>c</sup><br>(1.531) <sup>d</sup> | 1.535<br>(1.523) <sup>a</sup><br>(1.518) <sup>b</sup><br>(1.530) <sup>c</sup><br>(1.531) <sup>d</sup> | 1.535<br>(1.523) <sup>a</sup><br>(1.518) <sup>b</sup><br>(1.530) <sup>c</sup><br>(1.531) <sup>d</sup> | 1.535<br>(1.524) <sup>a</sup><br>(1.518) <sup>b</sup><br>(1.530) <sup>c</sup><br>(1.531) <sup>d</sup> | 1.534<br>(1.523) <sup>a</sup><br>(1.518) <sup>b</sup><br>(1.530) <sup>c</sup><br>(1.530) <sup>d</sup> | 1.536<br>(1.524) <sup>a</sup><br>(1.519) <sup>b</sup><br>(1.531) <sup>c</sup><br>(1.532) <sup>d</sup> | 1.535<br>(1.524) <sup>a</sup><br>(1.518) <sup>b</sup><br>(1.530) <sup>c</sup><br>(1.531) <sup>d</sup> |
| $r_{5-6}$        | 1.526<br>(1.516) <sup>a</sup>                                                                         | 1.526<br>(1.516) <sup>a</sup>                                                                         | 1.529<br>(1.520) <sup>a</sup>                                                                                                   | 1.528<br>(1.519) <sup>a</sup>                                                                         | 1.527<br>(1.519) <sup>a</sup>                                                                                                   | 1.526<br>(1.518) <sup>a</sup>                                                                         | 1.526<br>(1.516) <sup>a</sup>                                                                         | 1.527<br>(1.517) <sup>a</sup>                                                                         | 1.528<br>(1.519) <sup>a</sup>                                                                         | 1.528<br>(1.519) <sup>a</sup>                                                                         | 1.527<br>(1.519) <sup>a</sup>                                                                         | 1.526<br>(1.518) <sup>a</sup>                                                                         |

Table SI-1 continued...

|                   |                      |                      |                          |                      |                        |                      |                      |                      |                      |                      |                      |                      |
|-------------------|----------------------|----------------------|--------------------------|----------------------|------------------------|----------------------|----------------------|----------------------|----------------------|----------------------|----------------------|----------------------|
|                   | (1.510) <sup>b</sup> | (1.510) <sup>b</sup> | (1.514) <sup>b</sup>     | (1.513) <sup>b</sup> | (1.513) <sup>b</sup>   | (1.513) <sup>b</sup> | (1.510) <sup>b</sup> | (1.510) <sup>b</sup> | (1.514) <sup>b</sup> | (1.513) <sup>b</sup> | (1.513) <sup>b</sup> | (1.512) <sup>b</sup> |
|                   | (1.522) <sup>c</sup> | (1.522) <sup>c</sup> | (1.525) <sup>c</sup>     | (1.525) <sup>c</sup> | (1.524) <sup>c</sup>   | (1.523) <sup>c</sup> | (1.523) <sup>c</sup> | (1.523) <sup>c</sup> | (1.525) <sup>c</sup> | (1.524) <sup>c</sup> | (1.523) <sup>c</sup> | (1.523) <sup>c</sup> |
|                   | (1.524) <sup>d</sup> | (1.524) <sup>d</sup> | (1.527) <sup>d</sup>     | (1.526) <sup>d</sup> | (1.527) <sup>d</sup>   | (1.526) <sup>d</sup> | (1.523) <sup>d</sup> | (1.523) <sup>d</sup> | (1.527) <sup>d</sup> | (1.526) <sup>d</sup> | (1.526) <sup>d</sup> | (1.525) <sup>d</sup> |
|                   |                      |                      | (1.519±2) <sup>e</sup>   |                      | (1.515±7) <sup>e</sup> |                      |                      |                      |                      |                      |                      |                      |
| $r_{6-1}$         | 1.437                | 1.433                | 1.838                    | 1.837                | 1.984                  | 1.984                | 1.440                | 1.433                | 1.838                | 1.838                | 1.983                | 1.984                |
|                   | (1.422) <sup>a</sup> | (1.418) <sup>a</sup> | (1.804) <sup>a</sup>     | (1.803) <sup>a</sup> | (1.936) <sup>a</sup>   | (1.936) <sup>a</sup> | (1.424) <sup>a</sup> | (1.418) <sup>a</sup> | (1.804) <sup>a</sup> | (1.804) <sup>a</sup> | (1.936) <sup>a</sup> | (1.938) <sup>a</sup> |
|                   | (1.416) <sup>b</sup> | (1.412) <sup>b</sup> | (1.800) <sup>b</sup>     | (1.799) <sup>b</sup> | (1.931) <sup>b</sup>   | (1.931) <sup>b</sup> | (1.418) <sup>b</sup> | (1.412) <sup>b</sup> | (1.800) <sup>b</sup> | (1.800) <sup>b</sup> | (1.931) <sup>b</sup> | (1.933) <sup>b</sup> |
|                   | (1.426) <sup>c</sup> | (1.422) <sup>c</sup> | (1.823) <sup>c</sup>     | (1.821) <sup>c</sup> | (1.963) <sup>c</sup>   | (1.963) <sup>c</sup> | (1.428) <sup>c</sup> | (1.422) <sup>c</sup> | (1.823) <sup>c</sup> | (1.822) <sup>c</sup> | (1.964) <sup>c</sup> | (1.964) <sup>c</sup> |
|                   | (1.432) <sup>d</sup> | (1.429) <sup>d</sup> | (1.815) <sup>d</sup>     | (1.815) <sup>d</sup> | (1.961) <sup>d</sup>   | (1.962) <sup>d</sup> | (1.436) <sup>d</sup> | (1.431) <sup>d</sup> | (1.815) <sup>d</sup> | (1.816) <sup>d</sup> | (1.962) <sup>d</sup> | (1.964) <sup>d</sup> |
|                   |                      |                      | (1.8080±15) <sup>e</sup> |                      | (1.937±5) <sup>e</sup> |                      |                      |                      |                      |                      |                      |                      |
| $r_{2-C\equiv N}$ | 1.484                | 1.468                | 1.463                    | 1.458                | 1.457                  | 1.453                | -                    | -                    | -                    | -                    | -                    | -                    |
|                   | (1.481) <sup>a</sup> | (1.467) <sup>a</sup> | (1.463) <sup>a</sup>     | (1.458) <sup>a</sup> | (1.459) <sup>a</sup>   | (1.455) <sup>a</sup> | -                    | -                    | -                    | -                    | -                    | -                    |
|                   | (1.475) <sup>b</sup> | (1.460) <sup>b</sup> | (1.457) <sup>b</sup>     | (1.452) <sup>b</sup> | (1.453) <sup>b</sup>   | (1.449) <sup>b</sup> | -                    | -                    | -                    | -                    | -                    | -                    |
|                   | (1.487) <sup>c</sup> | (1.471) <sup>c</sup> | (1.466) <sup>c</sup>     | (1.461) <sup>c</sup> | (1.461) <sup>c</sup>   | (1.457) <sup>c</sup> | -                    | -                    | -                    | -                    | -                    | -                    |
|                   | (1.484) <sup>d</sup> | (1.469) <sup>d</sup> | (1.466) <sup>d</sup>     | (1.462) <sup>d</sup> | (1.461) <sup>d</sup>   | (1.458) <sup>d</sup> | -                    | -                    | -                    | -                    | -                    | -                    |
|                   |                      |                      | (1.477±2) <sup>e</sup>   |                      | (1.465±6) <sup>e</sup> |                      |                      |                      |                      |                      |                      |                      |
| $r_{C\equiv N}$   | 1.153                | 1.152                | 1.154                    | 1.153                | 1.155                  | 1.154                | -                    | -                    | -                    | -                    | -                    | -                    |
|                   | (1.146) <sup>a</sup> | (1.145) <sup>a</sup> | (1.147) <sup>a</sup>     | (1.146) <sup>a</sup> | (1.147) <sup>a</sup>   | (1.147) <sup>a</sup> | -                    | -                    | -                    | -                    | -                    | -                    |
|                   | (1.138) <sup>b</sup> | (1.137) <sup>b</sup> | (1.139) <sup>b</sup>     | (1.138) <sup>b</sup> | (1.139) <sup>b</sup>   | (1.139) <sup>b</sup> | -                    | -                    | -                    | -                    | -                    | -                    |
|                   | (1.149) <sup>c</sup> | (1.148) <sup>c</sup> | (1.149) <sup>c</sup>     | (1.149) <sup>c</sup> | (1.150) <sup>c</sup>   | (1.149) <sup>c</sup> | -                    | -                    | -                    | -                    | -                    | -                    |
|                   | (1.176) <sup>d</sup> | (1.175) <sup>d</sup> | (1.177) <sup>d</sup>     | (1.176) <sup>d</sup> | (1.178) <sup>d</sup>   | (1.177) <sup>d</sup> | -                    | -                    | -                    | -                    | -                    | -                    |
|                   |                      |                      | (1.138±2) <sup>e</sup>   |                      | (1.137±6) <sup>e</sup> |                      |                      |                      |                      |                      |                      |                      |
| $r_{2-N=C}$       | -                    | -                    | -                        | -                    | -                      | -                    | 1.449                | 1.423                | 1.430                | 1.420                | 1.423                | 1.416                |
|                   | -                    | -                    | -                        | -                    | -                      | -                    | (1.442) <sup>a</sup> | (1.420) <sup>a</sup> | (1.428) <sup>a</sup> | (1.419) <sup>a</sup> | (1.423) <sup>a</sup> | (1.417) <sup>a</sup> |
|                   | -                    | -                    | -                        | -                    | -                      | -                    | (1.437) <sup>b</sup> | (1.414) <sup>b</sup> | (1.423) <sup>b</sup> | (1.414) <sup>b</sup> | (1.419) <sup>b</sup> | (1.412) <sup>b</sup> |
|                   | -                    | -                    | -                        | -                    | -                      | -                    | (1.448) <sup>c</sup> | (1.424) <sup>c</sup> | (1.429) <sup>c</sup> | (1.420) <sup>c</sup> | (1.424) <sup>c</sup> | (1.418) <sup>c</sup> |
|                   | -                    | -                    | -                        | -                    | -                      | -                    | (1.444) <sup>d</sup> | (1.422) <sup>d</sup> | (1.430) <sup>d</sup> | (1.421) <sup>d</sup> | (1.424) <sup>d</sup> | (1.419) <sup>d</sup> |
| $r_{N=C}$         | -                    | -                    | -                        | -                    | -                      | -                    | 1.171                | 1.171                | 1.171                | 1.172                | 1.172                | 1.172                |
|                   | -                    | -                    | -                        | -                    | -                      | -                    | (1.165) <sup>a</sup> | (1.164) <sup>a</sup> | (1.165) <sup>a</sup> | (1.165) <sup>a</sup> | (1.165) <sup>a</sup> | (1.165) <sup>a</sup> |
|                   | -                    | -                    | -                        | -                    | -                      | -                    | (1.157) <sup>b</sup> | (1.156) <sup>b</sup> | (1.157) <sup>b</sup> | (1.157) <sup>b</sup> | (1.157) <sup>b</sup> | (1.157) <sup>b</sup> |
|                   | -                    | -                    | -                        | -                    | -                      | -                    | (1.168) <sup>c</sup> | (1.168) <sup>c</sup> | (1.429) <sup>c</sup> | (1.168) <sup>c</sup> | (1.168) <sup>c</sup> | (1.168) <sup>c</sup> |

Table SI-1 continued...

|                                                                 |                       |                      |                      |                      |                      |                      |                       |                      |                      |                      |                      |                      |
|-----------------------------------------------------------------|-----------------------|----------------------|----------------------|----------------------|----------------------|----------------------|-----------------------|----------------------|----------------------|----------------------|----------------------|----------------------|
|                                                                 | -                     | -                    | -                    | -                    | -                    | -                    | (1.188) <sup>d</sup>  | (1.187) <sup>d</sup> | (1.188) <sup>d</sup> | (1.188) <sup>d</sup> | (1.189) <sup>d</sup> | (1.188) <sup>d</sup> |
| $\Delta[r_{1-2}(\text{eq})-r_{1-2}(\text{ax})]$                 | 0.003                 |                      | 0.006                |                      | 0.006                |                      | 0.011                 |                      | 0.013                |                      | 0.01                 |                      |
|                                                                 | 0.003                 |                      | 0.005                |                      | 0.005                |                      | 0.010                 |                      | 0.011                |                      | 0.01                 |                      |
|                                                                 | 0.003                 |                      | 0.006                |                      | 0.005                |                      | 0.01                  |                      | 0.011                |                      | 0.01                 |                      |
|                                                                 | 0.003                 |                      | 0.006                |                      | 0.005                |                      | 0.01                  |                      | 0.011                |                      | 0.01                 |                      |
|                                                                 | (0.002) <sup>d</sup>  |                      | (0.004) <sup>d</sup> |                      | (0.003) <sup>d</sup> |                      | (0.01) <sup>d</sup>   |                      | (0.011) <sup>d</sup> |                      | (0.01) <sup>d</sup>  |                      |
| $\Delta[r_{2-C\equiv N}(\text{ax})-r_{2-C\equiv N}(\text{eq})]$ | 0.016                 |                      | 0.005                |                      | 0.004                |                      | -                     |                      | -                    |                      | -                    |                      |
|                                                                 | 0.014                 |                      | 0.005                |                      | 0.004                |                      | -                     |                      | -                    |                      | -                    |                      |
|                                                                 | 0.016                 |                      | 0.005                |                      | 0.004                |                      | -                     |                      | -                    |                      | -                    |                      |
|                                                                 | 0.016                 |                      | 0.005                |                      | 0.004                |                      | -                     |                      | -                    |                      | -                    |                      |
|                                                                 | (0.015) <sup>d</sup>  |                      | (0.004) <sup>d</sup> |                      | (0.003) <sup>d</sup> |                      | -                     |                      | -                    |                      | -                    |                      |
| $\Delta[r_{2-N=C}(\text{ax})-r_{2-N=C}(\text{eq})]$             | -                     |                      | -                    |                      | -                    |                      | 0.026                 |                      | 0.010                |                      | 0.007                |                      |
|                                                                 | -                     |                      | -                    |                      | -                    |                      | 0.022                 |                      | 0.009                |                      | 0.006                |                      |
|                                                                 | -                     |                      | -                    |                      | -                    |                      | 0.023                 |                      | 0.009                |                      | 0.007                |                      |
|                                                                 | -                     |                      | -                    |                      | -                    |                      | 0.024                 |                      | 0.009                |                      | 0.006                |                      |
|                                                                 | -                     |                      | -                    |                      | -                    |                      | (0.022) <sup>d</sup>  |                      | (0.009) <sup>d</sup> |                      | (0.005) <sup>d</sup> |                      |
| $\Delta[r_{1-2}(\text{ax})-r_{1-6}(\text{ax})]$                 | -0.018                |                      | 0.013                |                      | 0.019                |                      | -0.036                |                      | 0.005                |                      | 0.014                |                      |
|                                                                 | -0.019                |                      | 0.008                |                      | 0.013                |                      | -0.033                |                      | 0.002                |                      | 0.008                |                      |
|                                                                 | -0.02                 |                      | -0.008               |                      | 0.012                |                      | -0.034                |                      | 0.002                |                      | 0.008                |                      |
|                                                                 | -0.02                 |                      | -0.008               |                      | 0.012                |                      | -0.034                |                      | 0.002                |                      | 0.008                |                      |
|                                                                 | (-0.015) <sup>d</sup> |                      | (0.009) <sup>d</sup> |                      | (0.016) <sup>d</sup> |                      | (-0.035) <sup>d</sup> |                      | (0.004) <sup>d</sup> |                      | (0.009) <sup>d</sup> |                      |
| $\Delta[r_{1-2}(\text{eq})-r_{1-6}(\text{eq})]$                 | -0.011                |                      | 0.020                |                      | 0.025                |                      | -0.018                |                      | 0.018                |                      | 0.023                |                      |
|                                                                 | -0.012                |                      | 0.014                |                      | 0.018                |                      | -0.017                |                      | 0.013                |                      | 0.016                |                      |
|                                                                 | -0.013                |                      | 0.014                |                      | 0.017                |                      | -0.018                |                      | 0.014                |                      | 0.016                |                      |
|                                                                 | -0.013                |                      | 0.014                |                      | 0.017                |                      | -0.018                |                      | 0.014                |                      | 0.016                |                      |
|                                                                 | (-0.010) <sup>d</sup> |                      | (0.013) <sup>d</sup> |                      | (0.018) <sup>d</sup> |                      | (-0.021) <sup>d</sup> |                      | 0.01 <sup>d</sup>    |                      | (0.014) <sup>d</sup> |                      |
| Bond angles (°)                                                 |                       |                      |                      |                      |                      |                      |                       |                      |                      |                      |                      |                      |
| $\theta_{1-2-3}$                                                | 112.0                 | 111.9                | 112.0                | 112.3                | 111.6                | 112.0                | 112.6                 | 111.8                | 112.4                | 112.3                | 111.8                | 112.0                |
|                                                                 | (112.1) <sup>a</sup>  | (111.9) <sup>a</sup> | (112.1) <sup>a</sup> | (112.4) <sup>a</sup> | (111.8) <sup>a</sup> | (112.1) <sup>a</sup> | (112.6) <sup>a</sup>  | (111.8) <sup>a</sup> | (112.4) <sup>a</sup> | (112.4) <sup>a</sup> | (112.0) <sup>a</sup> | (112.1) <sup>a</sup> |
|                                                                 | (111.9) <sup>b</sup>  | (111.7) <sup>b</sup> | (112.2) <sup>b</sup> | (112.5) <sup>b</sup> | (111.8) <sup>b</sup> | (112.2) <sup>b</sup> | (112.3) <sup>b</sup>  | (111.6) <sup>b</sup> | (112.5) <sup>b</sup> | (112.5) <sup>b</sup> | (112.1) <sup>b</sup> | (112.3) <sup>b</sup> |

Table SI-1 continued...

|                  |                      |                      |                          |                      |                        |                      |                      |                      |                      |                      |                      |                      |
|------------------|----------------------|----------------------|--------------------------|----------------------|------------------------|----------------------|----------------------|----------------------|----------------------|----------------------|----------------------|----------------------|
|                  | (112.0) <sup>c</sup> | (111.9) <sup>c</sup> | (112.0) <sup>c</sup>     | (112.4) <sup>c</sup> | (111.7) <sup>c</sup>   | (112.1) <sup>c</sup> | (112.5) <sup>c</sup> | (111.8) <sup>c</sup> | (112.4) <sup>c</sup> | (112.4) <sup>c</sup> | (111.1) <sup>c</sup> | (112.1) <sup>c</sup> |
|                  | (111.9) <sup>d</sup> | (111.9) <sup>d</sup> | (112.0) <sup>d</sup>     | (112.4) <sup>d</sup> | (111.5) <sup>d</sup>   | (112.0) <sup>d</sup> | (112.8) <sup>d</sup> | (112.1) <sup>d</sup> | (112.7) <sup>d</sup> | (112.6) <sup>d</sup> | (112.1) <sup>d</sup> | (112.3) <sup>d</sup> |
|                  |                      |                      | (112.73±9) <sup>c</sup>  |                      | (112.4±3) <sup>c</sup> |                      |                      |                      |                      |                      |                      |                      |
| $\theta_{2-3-4}$ | 111.0                | 109.6                | 113.5                    | 112.3                | 114.3                  | 113.3                | 111.2                | 109.7                | 113.8                | 112.4                | 114.7                | 113.2                |
|                  | (110.5) <sup>a</sup> | (109.2) <sup>a</sup> | (112.8) <sup>a</sup>     | (111.8) <sup>a</sup> | (113.6) <sup>a</sup>   | (112.6) <sup>a</sup> | (110.8) <sup>a</sup> | (109.3) <sup>a</sup> | (113.1) <sup>a</sup> | (111.9) <sup>a</sup> | (113.9) <sup>a</sup> | (112.6) <sup>a</sup> |
|                  | (110.6) <sup>b</sup> | (109.4) <sup>b</sup> | (112.9) <sup>b</sup>     | (112.0) <sup>b</sup> | (113.7) <sup>b</sup>   | (112.8) <sup>b</sup> | (110.8) <sup>b</sup> | (109.4) <sup>b</sup> | (113.2) <sup>b</sup> | (112.1) <sup>b</sup> | (113.9) <sup>b</sup> | (112.8) <sup>b</sup> |
|                  | (110.3) <sup>c</sup> | (109.1) <sup>c</sup> | (112.7) <sup>c</sup>     | (111.7) <sup>c</sup> | (113.5) <sup>c</sup>   | (112.5) <sup>c</sup> | (110.5) <sup>c</sup> | (109.2) <sup>c</sup> | (112.9) <sup>c</sup> | (111.8) <sup>c</sup> | (113.7) <sup>c</sup> | (112.6) <sup>c</sup> |
|                  | (110.2) <sup>d</sup> | (109.2) <sup>d</sup> | (112.4) <sup>d</sup>     | (111.6) <sup>d</sup> | (113.2) <sup>d</sup>   | (112.5) <sup>d</sup> | (110.3) <sup>d</sup> | (109.1) <sup>d</sup> | (112.5) <sup>d</sup> | (111.6) <sup>d</sup> | (113.3) <sup>d</sup> | (112.5) <sup>d</sup> |
|                  |                      |                      | (112.50±11) <sup>c</sup> |                      | (113.1±4) <sup>c</sup> |                      |                      |                      |                      |                      |                      |                      |
| $\theta_{3-4-5}$ | 110.1                | 110.5                | 113.4                    | 113.6                | 114.3                  | 114.7                | 110.0                | 110.4                | 113.4                | 113.6                | 114.4                | 114.6                |
|                  | (109.7) <sup>a</sup> | (110.1) <sup>a</sup> | (113.0) <sup>a</sup>     | (113.1) <sup>a</sup> | (114.0) <sup>a</sup>   | (114.1) <sup>a</sup> | (109.6) <sup>a</sup> | (110.1) <sup>a</sup> | (112.9) <sup>a</sup> | (113.1) <sup>a</sup> | (113.9) <sup>a</sup> | (114.0) <sup>a</sup> |
|                  | (109.8) <sup>b</sup> | (110.1) <sup>b</sup> | (113.1) <sup>b</sup>     | (113.2) <sup>b</sup> | (114.0) <sup>b</sup>   | (114.1) <sup>b</sup> | (109.7) <sup>b</sup> | (110.1) <sup>b</sup> | (113.0) <sup>b</sup> | (113.1) <sup>b</sup> | (114.0) <sup>b</sup> | (114.1) <sup>b</sup> |
|                  | (109.6) <sup>c</sup> | (109.9) <sup>c</sup> | (113.0) <sup>c</sup>     | (113.1) <sup>c</sup> | (114.0) <sup>c</sup>   | (114.1) <sup>c</sup> | (109.4) <sup>c</sup> | (109.9) <sup>c</sup> | (112.1) <sup>c</sup> | (113.0) <sup>c</sup> | (113.9) <sup>c</sup> | (114.0) <sup>c</sup> |
|                  | (109.4) <sup>d</sup> | (109.7) <sup>d</sup> | (112.9) <sup>d</sup>     | (112.9) <sup>d</sup> | (114.0) <sup>d</sup>   | (114.0) <sup>d</sup> | (109.3) <sup>d</sup> | (109.7) <sup>d</sup> | (112.8) <sup>d</sup> | (112.8) <sup>d</sup> | (114.0) <sup>d</sup> | (113.9) <sup>d</sup> |
|                  |                      |                      | (113.27±12) <sup>c</sup> |                      | (114.1±4) <sup>c</sup> |                      |                      |                      |                      |                      |                      |                      |
| $\theta_{4-5-6}$ | 110.5                | 110.3                | 113.0                    | 112.8                | 113.7                  | 113.7                | 110.3                | 110.2                | 112.8                | 112.7                | 113.7                | 113.6                |
|                  | (110.1) <sup>a</sup> | (110.0) <sup>a</sup> | (112.5) <sup>a</sup>     | (112.3) <sup>a</sup> | (113.2) <sup>a</sup>   | (113.1) <sup>a</sup> | (110.0) <sup>a</sup> | (109.9) <sup>a</sup> | (112.3) <sup>a</sup> | (112.2) <sup>a</sup> | (113.1) <sup>a</sup> | (113.0) <sup>a</sup> |
|                  | (110.2) <sup>b</sup> | (110.1) <sup>b</sup> | (112.5) <sup>b</sup>     | (112.3) <sup>b</sup> | (113.3) <sup>b</sup>   | (113.1) <sup>b</sup> | (110.1) <sup>b</sup> | (109.9) <sup>b</sup> | (112.4) <sup>b</sup> | (112.2) <sup>b</sup> | (113.1) <sup>b</sup> | (113.0) <sup>b</sup> |
|                  | (110.0) <sup>c</sup> | (109.9) <sup>c</sup> | (112.5) <sup>c</sup>     | (112.2) <sup>c</sup> | (113.3) <sup>c</sup>   | (113.0) <sup>c</sup> | (109.9) <sup>c</sup> | (109.7) <sup>c</sup> | (112.4) <sup>c</sup> | (112.1) <sup>c</sup> | (113.1) <sup>c</sup> | (112.9) <sup>c</sup> |
|                  | (110.2) <sup>d</sup> | (109.9) <sup>d</sup> | (112.5) <sup>d</sup>     | (112.0) <sup>d</sup> | (113.3) <sup>d</sup>   | (112.9) <sup>d</sup> | (110.2) <sup>d</sup> | (109.7) <sup>d</sup> | (112.4) <sup>d</sup> | (111.9) <sup>d</sup> | (113.3) <sup>d</sup> | (112.9) <sup>d</sup> |
|                  |                      |                      | (112.51±12) <sup>c</sup> |                      | (113.6±3) <sup>c</sup> |                      |                      |                      |                      |                      |                      |                      |
| $\theta_{5-6-1}$ | 111.7                | 111.6                | 112.9                    | 113.1                | 112.6                  | 112.8                | 111.7                | 111.6                | 112.9                | 113.0                | 112.7                | 112.8                |
|                  | (111.6) <sup>a</sup> | (111.5) <sup>a</sup> | (112.6) <sup>a</sup>     | (112.8) <sup>a</sup> | (112.4) <sup>a</sup>   | (112.6) <sup>a</sup> | (111.6) <sup>a</sup> | (111.4) <sup>a</sup> | (112.6) <sup>a</sup> | (112.8) <sup>a</sup> | (112.4) <sup>a</sup> | (112.6) <sup>a</sup> |
|                  | (111.4) <sup>b</sup> | (111.3) <sup>b</sup> | (112.7) <sup>b</sup>     | (112.9) <sup>b</sup> | (112.5) <sup>b</sup>   | (112.8) <sup>b</sup> | (111.4) <sup>b</sup> | (111.2) <sup>b</sup> | (112.7) <sup>b</sup> | (112.9) <sup>b</sup> | (112.5) <sup>b</sup> | (112.7) <sup>b</sup> |
|                  | (111.5) <sup>c</sup> | (111.4) <sup>c</sup> | (112.5) <sup>c</sup>     | (112.7) <sup>c</sup> | (112.2) <sup>c</sup>   | (112.5) <sup>c</sup> | (111.5) <sup>c</sup> | (111.3) <sup>c</sup> | (112.5) <sup>c</sup> | (112.7) <sup>c</sup> | (112.3) <sup>c</sup> | (112.4) <sup>c</sup> |
|                  | (111.6) <sup>d</sup> | (111.4) <sup>d</sup> | (112.4) <sup>d</sup>     | (112.6) <sup>d</sup> | (112.2) <sup>d</sup>   | (112.4) <sup>d</sup> | (111.6) <sup>d</sup> | (111.3) <sup>d</sup> | (112.5) <sup>d</sup> | (112.6) <sup>d</sup> | (112.2) <sup>d</sup> | (112.5) <sup>d</sup> |
|                  |                      |                      | (112.93±10) <sup>c</sup> |                      | (113.1±3) <sup>c</sup> |                      |                      |                      |                      |                      |                      |                      |
| $\theta_{6-1-2}$ | 113.9                | 112.0                | 98.1                     | 97.0                 | 94.8                   | 94.1                 | 114.6                | 112.0                | 98.3                 | 97.0                 | 94.9                 | 94.1                 |
|                  | (113.3) <sup>a</sup> | (111.5) <sup>a</sup> | (97.8) <sup>a</sup>      | (96.9) <sup>a</sup>  | (94.5) <sup>a</sup>    | (94.0) <sup>a</sup>  | (114.1) <sup>a</sup> | (111.5) <sup>a</sup> | (98.0) <sup>a</sup>  | (96.7) <sup>a</sup>  | (94.7) <sup>a</sup>  | (94.1) <sup>a</sup>  |
|                  | (113.9) <sup>b</sup> | (112.2) <sup>b</sup> | (97.8) <sup>b</sup>      | (96.9) <sup>b</sup>  | (94.6) <sup>b</sup>    | (94.1) <sup>b</sup>  | (114.6) <sup>b</sup> | (112.2) <sup>b</sup> | (98.0) <sup>b</sup>  | (96.8) <sup>b</sup>  | (94.7) <sup>b</sup>  | (94.2) <sup>b</sup>  |
|                  | (113.5) <sup>c</sup> | (111.7) <sup>c</sup> | (97.1) <sup>c</sup>      | (96.3) <sup>c</sup>  | (93.5) <sup>c</sup>    | (93.4) <sup>c</sup>  | (114.1) <sup>c</sup> | (111.7) <sup>c</sup> | (97.2) <sup>c</sup>  | (96.2) <sup>c</sup>  | (93.8) <sup>c</sup>  | (93.5) <sup>c</sup>  |

Table SI-1 continued...

|                                                 |                      |                      |                          |                      |                        |                       |                      |                      |                      |                      |                      |                      |
|-------------------------------------------------|----------------------|----------------------|--------------------------|----------------------|------------------------|-----------------------|----------------------|----------------------|----------------------|----------------------|----------------------|----------------------|
|                                                 | (112.2) <sup>d</sup> | (110.5) <sup>d</sup> | (96.7) <sup>d</sup>      | (96.2) <sup>d</sup>  | (93.0) <sup>d</sup>    | (93.1) <sup>d</sup>   | (113.0) <sup>d</sup> | (110.5) <sup>d</sup> | (96.8) <sup>d</sup>  | (95.9) <sup>d</sup>  | (93.0) <sup>d</sup>  | (93.0) <sup>d</sup>  |
|                                                 |                      |                      | (98.93±7) <sup>e</sup>   |                      | (95.7±2) <sup>e</sup>  |                       |                      |                      |                      |                      |                      |                      |
| $\theta_{1-2-C\equiv N}$                        | 111.1                | 107.7                | 110.8                    | 108.1                | 110.2                  | 107.7                 | -                    | -                    | -                    | -                    | -                    | -                    |
|                                                 | (110.9) <sup>a</sup> | (107.8) <sup>a</sup> | (110.7) <sup>a</sup>     | (108.3) <sup>a</sup> | (110.3) <sup>a</sup>   | (108.1) <sup>a</sup>  | -                    | -                    | -                    | -                    | -                    | -                    |
|                                                 | (110.8) <sup>b</sup> | (107.8) <sup>b</sup> | (110.8) <sup>b</sup>     | (108.4) <sup>b</sup> | (110.4) <sup>b</sup>   | (108.2) <sup>b</sup>  | -                    | -                    | -                    | -                    | -                    | -                    |
|                                                 | (110.8) <sup>c</sup> | (107.6) <sup>c</sup> | (110.1) <sup>c</sup>     | (107.9) <sup>c</sup> | (109.5) <sup>c</sup>   | (107.70) <sup>c</sup> | -                    | -                    | -                    | -                    | -                    | -                    |
|                                                 | (110.8) <sup>d</sup> | (107.3) <sup>d</sup> | (110.5) <sup>d</sup>     | (108.0) <sup>d</sup> | (109.7) <sup>d</sup>   | (107.7) <sup>d</sup>  | -                    | -                    | -                    | -                    | -                    | -                    |
|                                                 |                      |                      | (109.55±10) <sup>e</sup> |                      | (110.1±3) <sup>e</sup> |                       |                      |                      |                      |                      |                      |                      |
| $\theta_{1-2-N=C}$                              | -                    | -                    | -                        | -                    | -                      | -                     | 110.7                | 107.1                | 111.5                | 107.7                | 111.3                | 107.7                |
|                                                 | -                    | -                    | -                        | -                    | -                      | -                     | (110.5) <sup>a</sup> | (107.2) <sup>a</sup> | (111.3) <sup>a</sup> | (107.8) <sup>a</sup> | (111.1) <sup>a</sup> | (107.9) <sup>a</sup> |
|                                                 | -                    | -                    | -                        | -                    | -                      | -                     | (110.3) <sup>b</sup> | (107.3) <sup>b</sup> | (111.3) <sup>b</sup> | (107.8) <sup>b</sup> | (111.0) <sup>b</sup> | (107.9) <sup>b</sup> |
|                                                 | -                    | -                    | -                        | -                    | -                      | -                     | (110.3) <sup>c</sup> | (107.1) <sup>c</sup> | (110.8) <sup>c</sup> | (107.6) <sup>c</sup> | (110.5) <sup>c</sup> | (107.7) <sup>c</sup> |
|                                                 | -                    | -                    | -                        | -                    | -                      | -                     | (110.2) <sup>d</sup> | (106.6) <sup>d</sup> | (110.9) <sup>d</sup> | (107.5) <sup>d</sup> | (110.4) <sup>d</sup> | (107.5) <sup>d</sup> |
| $\Delta[\theta_{6-1-2(ax)}-\theta_{6-1-2(eq)}]$ | 1.8                  |                      | 1.1                      |                      | 0.71                   |                       | 2.5                  |                      | 1.4                  |                      | 0.8                  |                      |
|                                                 | (1.8) <sup>a</sup>   |                      | (0.9) <sup>a</sup>       |                      | (0.5) <sup>a</sup>     |                       | (2.6) <sup>a</sup>   |                      | (1.3) <sup>a</sup>   |                      | (0.6) <sup>a</sup>   |                      |
|                                                 | (1.8) <sup>b</sup>   |                      | (0.8) <sup>b</sup>       |                      | (0.1) <sup>b</sup>     |                       | (2.4) <sup>b</sup>   |                      | (1.3) <sup>b</sup>   |                      | (0.3) <sup>b</sup>   |                      |
|                                                 | (1.8) <sup>c</sup>   |                      | (0.8) <sup>c</sup>       |                      | (0.1) <sup>c</sup>     |                       | (2.4) <sup>c</sup>   |                      | (1.3) <sup>c</sup>   |                      | (0.3) <sup>c</sup>   |                      |
|                                                 | (1.7) <sup>d</sup>   |                      | (0.5) <sup>d</sup>       |                      | (0.1) <sup>d</sup>     |                       | (2.5) <sup>d</sup>   |                      | (0.9) <sup>d</sup>   |                      | (0.0) <sup>d</sup>   |                      |
| Torsion angles (°)                              |                      |                      |                          |                      |                        |                       |                      |                      |                      |                      |                      |                      |
| $\phi_{1-2-3-4}$                                | 53.2                 | 55.9                 | 59.5                     | 61.0                 | 60.6                   | 61.5                  | 52.2                 | 56.3                 | 58.9                 | 61.2                 | 60.2                 | 61.7                 |
|                                                 | (54.3) <sup>a</sup>  | (57.0) <sup>a</sup>  | (60.5) <sup>a</sup>      | (61.9) <sup>a</sup>  | (61.7) <sup>a</sup>    | (62.5) <sup>a</sup>   | (53.3) <sup>a</sup>  | (57.3) <sup>a</sup>  | (59.9) <sup>a</sup>  | (62.2) <sup>a</sup>  | (61.1) <sup>a</sup>  | (62.7) <sup>a</sup>  |
|                                                 | (54.0) <sup>b</sup>  | (56.5) <sup>b</sup>  | (60.4) <sup>b</sup>      | (61.6) <sup>b</sup>  | (61.5) <sup>b</sup>    | (62.2) <sup>b</sup>   | (53.1) <sup>b</sup>  | (56.8) <sup>b</sup>  | (59.9) <sup>b</sup>  | (61.8) <sup>b</sup>  | (61.0) <sup>b</sup>  | (62.4) <sup>b</sup>  |
|                                                 | (54.6) <sup>c</sup>  | (56.9) <sup>c</sup>  | (61.3) <sup>c</sup>      | (62.2) <sup>c</sup>  | (62.4) <sup>c</sup>    | (62.9) <sup>c</sup>   | (53.7) <sup>c</sup>  | (57.3) <sup>c</sup>  | (60.7) <sup>c</sup>  | (62.5) <sup>c</sup>  | (62.0) <sup>c</sup>  | (63.0) <sup>c</sup>  |
|                                                 | (55.9) <sup>d</sup>  | (57.8) <sup>d</sup>  | (62.0) <sup>d</sup>      | (62.4) <sup>d</sup>  | (63.3) <sup>d</sup>    | (63.2) <sup>d</sup>   | (54.9) <sup>d</sup>  | (58.0) <sup>d</sup>  | (61.4) <sup>d</sup>  | (62.8) <sup>d</sup>  | (62.8) <sup>d</sup>  | (63.4) <sup>d</sup>  |
| $\phi_{2-3-4-5}$                                | -51.4                | -51.6                | -59.1                    | -59.6                | -62.8                  | -63.0                 | -51.1                | -51.7                | -58.8                | -59.8                | -62.2                | -63.4                |
|                                                 | (-52.2) <sup>a</sup> | (-52.4) <sup>a</sup> | (-59.0) <sup>a</sup>     | (-59.6) <sup>a</sup> | (-61.8) <sup>a</sup>   | (-62.6) <sup>a</sup>  | (-52.0) <sup>a</sup> | (-52.4) <sup>a</sup> | (-58.8) <sup>a</sup> | (-59.7) <sup>a</sup> | (-61.6) <sup>a</sup> | (-63.0) <sup>a</sup> |
|                                                 | (-52.3) <sup>b</sup> | (52.4) <sup>b</sup>  | (-59.0) <sup>b</sup>     | (-59.5) <sup>b</sup> | (-61.8) <sup>b</sup>   | (-62.6) <sup>b</sup>  | (-52.1) <sup>b</sup> | (-52.4) <sup>b</sup> | (-58.9) <sup>b</sup> | (-59.6) <sup>b</sup> | (-61.6) <sup>b</sup> | (-62.9) <sup>b</sup> |
|                                                 | (-52.7) <sup>c</sup> | (-52.7) <sup>c</sup> | (-59.2) <sup>c</sup>     | (-60.0) <sup>c</sup> | (-61.8) <sup>c</sup>   | (-63.2) <sup>c</sup>  | (-52.4) <sup>c</sup> | (-52.8) <sup>c</sup> | (-59.1) <sup>c</sup> | (-60.1) <sup>c</sup> | (-62.2) <sup>c</sup> | (-63.6) <sup>c</sup> |
|                                                 | (-52.7) <sup>d</sup> | (52.8) <sup>d</sup>  | (-58.9) <sup>d</sup>     | (-59.8) <sup>d</sup> | (-61.7) <sup>d</sup>   | (-63.0) <sup>d</sup>  | (-52.5) <sup>d</sup> | (-52.8) <sup>d</sup> | (-58.7) <sup>d</sup> | (-59.8) <sup>d</sup> | (-61.3) <sup>d</sup> | (-63.1) <sup>d</sup> |
| $\phi_{3-4-5-6}$                                | 52.5                 | 51.9                 | 59.2                     | 59.4                 | 63.0                   | 62.8                  | 52.7                 | 51.7                 | 59.3                 | 59.4                 | 62.3                 | 63.0                 |
|                                                 | (53.29) <sup>a</sup> | (52.6) <sup>a</sup>  | (59.3) <sup>a</sup>      | (59.5) <sup>a</sup>  | (61.9) <sup>a</sup>    | (62.5) <sup>a</sup>   | (53.6) <sup>a</sup>  | (52.3) <sup>a</sup>  | (59.4) <sup>a</sup>  | (59.3) <sup>a</sup>  | (62.0) <sup>a</sup>  | (62.6) <sup>a</sup>  |

Table SI-1 continued...

|                                                               |                      |                      |                      |                      |                      |                      |                      |                      |                      |                      |                      |                      |
|---------------------------------------------------------------|----------------------|----------------------|----------------------|----------------------|----------------------|----------------------|----------------------|----------------------|----------------------|----------------------|----------------------|----------------------|
|                                                               | (53.3) <sup>b</sup>  | (52.6) <sup>b</sup>  | (59.2) <sup>b</sup>  | (59.5) <sup>b</sup>  | (61.8) <sup>b</sup>  | (62.5) <sup>b</sup>  | (53.6) <sup>b</sup>  | (52.4) <sup>b</sup>  | (59.4) <sup>b</sup>  | (59.4) <sup>b</sup>  | (62.0) <sup>b</sup>  | (62.6) <sup>b</sup>  |
|                                                               | (53.7) <sup>c</sup>  | (53.1) <sup>c</sup>  | (59.5) <sup>c</sup>  | (60.1) <sup>c</sup>  | (62.1) <sup>c</sup>  | (63.3) <sup>c</sup>  | (54.0) <sup>c</sup>  | (52.9) <sup>c</sup>  | (59.6) <sup>c</sup>  | (60.0) <sup>c</sup>  | (62.6) <sup>c</sup>  | (63.4) <sup>c</sup>  |
|                                                               | (53.3) <sup>d</sup>  | (-53.1) <sup>d</sup> | (58.9) <sup>d</sup>  | (60.0) <sup>d</sup>  | (61.5) <sup>d</sup>  | (63.0) <sup>d</sup>  | (53.8) <sup>d</sup>  | (53.0) <sup>d</sup>  | (59.2) <sup>d</sup>  | (59.9) <sup>d</sup>  | (61.6) <sup>d</sup>  | (63.1) <sup>d</sup>  |
| $\phi_{4-5-6-1}$                                              | -55.2                | -55.6                | -60.6                | -60.9                | -61.9                | -61.6                | -54.9                | -55.3                | -60.6                | -60.9                | -61.4                | -61.4                |
|                                                               | (-56.1) <sup>a</sup> | (-56.3) <sup>a</sup> | (-61.5) <sup>a</sup> | (-61.8) <sup>a</sup> | (-62.5) <sup>a</sup> | (-62.5) <sup>a</sup> | (-55.8) <sup>a</sup> | (-56.2) <sup>a</sup> | (-61.6) <sup>a</sup> | (-61.8) <sup>a</sup> | (-62.6) <sup>a</sup> | (-62.3) <sup>a</sup> |
|                                                               | (-55.7) <sup>b</sup> | (56.0) <sup>b</sup>  | (-61.4) <sup>b</sup> | (-61.6) <sup>b</sup> | (-62.3) <sup>b</sup> | (-62.3) <sup>b</sup> | (-55.5) <sup>b</sup> | (-55.8) <sup>b</sup> | (-61.4) <sup>b</sup> | (-61.6) <sup>b</sup> | (-62.4) <sup>b</sup> | (-62.1) <sup>b</sup> |
|                                                               | (-56.2) <sup>c</sup> | (-56.7) <sup>c</sup> | (-62.0) <sup>c</sup> | (-62.4) <sup>c</sup> | (-63.3) <sup>c</sup> | (-63.1) <sup>c</sup> | (-56.0) <sup>c</sup> | (-56.5) <sup>c</sup> | (-62.1) <sup>c</sup> | (-62.4) <sup>c</sup> | (-63.2) <sup>c</sup> | (-62.9) <sup>c</sup> |
|                                                               | (-56.5) <sup>d</sup> | (57.5) <sup>d</sup>  | (-62.2) <sup>d</sup> | (-62.8) <sup>d</sup> | (-63.4) <sup>d</sup> | (-63.4) <sup>d</sup> | (-56.2) <sup>d</sup> | (-57.4) <sup>d</sup> | (-62.3) <sup>d</sup> | (-62.9) <sup>d</sup> | (-63.5) <sup>d</sup> | (-63.4) <sup>d</sup> |
| $\phi_{5-6-1-2}$                                              | 58.1                 | 60.2                 | 53.9                 | 54.6                 | 51.8                 | 52.0                 | 57.2                 | 60.4                 | 53.7                 | 54.6                 | 51.6                 | 51.6                 |
|                                                               | (58.8) <sup>a</sup>  | (60.9) <sup>a</sup>  | (55.6) <sup>a</sup>  | (56.0) <sup>a</sup>  | (53.9) <sup>a</sup>  | (53.6) <sup>a</sup>  | (57.8) <sup>a</sup>  | (61.2) <sup>a</sup>  | (55.2) <sup>a</sup>  | (56.1) <sup>a</sup>  | (53.6) <sup>a</sup>  | (53.4) <sup>a</sup>  |
|                                                               | (58.6) <sup>b</sup>  | (-60.6) <sup>b</sup> | (55.3) <sup>b</sup>  | (55.7) <sup>b</sup>  | (53.6) <sup>b</sup>  | (53.3) <sup>b</sup>  | (57.6) <sup>b</sup>  | (60.9) <sup>b</sup>  | (55.0) <sup>b</sup>  | (55.7) <sup>b</sup>  | (53.3) <sup>b</sup>  | (53.0) <sup>b</sup>  |
|                                                               | (58.8) <sup>c</sup>  | (60.9) <sup>c</sup>  | (56.0) <sup>c</sup>  | (56.2) <sup>c</sup>  | (54.0) <sup>c</sup>  | (53.7) <sup>c</sup>  | (58.0) <sup>c</sup>  | (61.2) <sup>c</sup>  | (55.8) <sup>c</sup>  | (56.3) <sup>c</sup>  | (54.0) <sup>c</sup>  | (53.5) <sup>c</sup>  |
|                                                               | (59.5) <sup>d</sup>  | (-61.7) <sup>d</sup> | (56.8) <sup>d</sup>  | (56.9) <sup>d</sup>  | (55.4) <sup>d</sup>  | (54.4) <sup>d</sup>  | (58.2) <sup>d</sup>  | (61.8) <sup>d</sup>  | (56.3) <sup>d</sup>  | (57.0) <sup>d</sup>  | (55.1) <sup>d</sup>  | (54.2) <sup>d</sup>  |
| $\phi_{6-1-2-3}$                                              | -56.8                | -60.5                | -53.0                | -54.5                | -50.7                | -51.9                | -55.4                | -61.0                | -52.3                | -54.7                | -50.5                | -51.8                |
|                                                               | (-57.7) <sup>a</sup> | (-61.4) <sup>a</sup> | (-54.8) <sup>a</sup> | (-56.1) <sup>a</sup> | (-53.2) <sup>a</sup> | (-53.6) <sup>a</sup> | (-56.3) <sup>a</sup> | (-61.9) <sup>a</sup> | (-54.0) <sup>a</sup> | (-56.3) <sup>a</sup> | (-52.5) <sup>a</sup> | (-53.6) <sup>a</sup> |
|                                                               | (-57.5) <sup>b</sup> | (-61.0) <sup>b</sup> | (-54.5) <sup>b</sup> | (-55.6) <sup>b</sup> | (-52.9) <sup>b</sup> | (-53.2) <sup>b</sup> | (-56.2) <sup>b</sup> | (-61.5) <sup>b</sup> | (-53.9) <sup>b</sup> | (-55.8) <sup>b</sup> | (-52.3) <sup>b</sup> | (-53.1) <sup>b</sup> |
|                                                               | (-57.9) <sup>c</sup> | (-61.3) <sup>c</sup> | (-55.4) <sup>c</sup> | (-56.2) <sup>c</sup> | (-54.0) <sup>c</sup> | (-53.7) <sup>c</sup> | (-56.7) <sup>c</sup> | (-61.8) <sup>c</sup> | (-54.8) <sup>c</sup> | (-56.4) <sup>c</sup> | (-53.1) <sup>c</sup> | (-53.6) <sup>c</sup> |
|                                                               | (-59.1) <sup>d</sup> | (-62.1) <sup>d</sup> | (-56.6) <sup>d</sup> | (-56.8) <sup>d</sup> | (-55.1) <sup>d</sup> | (-54.3) <sup>d</sup> | (-57.5) <sup>d</sup> | (-62.4) <sup>d</sup> | (-55.9) <sup>d</sup> | (-57.1) <sup>d</sup> | (-54.7) <sup>d</sup> | (-54.4) <sup>d</sup> |
| $\Delta[\phi_{6-1-2-3}(\text{ax})-\phi_{6-1-2-3}(\text{eq})]$ | 3.7                  |                      | 1.5                  |                      | 1.2                  |                      | 5.6                  |                      | 2.4                  |                      | 1.3                  |                      |
|                                                               | 3.7                  |                      | 1.3                  |                      | 0.4                  |                      | 5.6                  |                      | 2.3                  |                      | 1.1                  |                      |
|                                                               | 3.5                  |                      | 1.1                  |                      | 0.3                  |                      | 5.3                  |                      | 1.9                  |                      | 0.8                  |                      |
|                                                               | 3.7                  |                      | 1.5                  |                      | 1.2                  |                      | 5.6                  |                      | 2.4                  |                      | 1.3                  |                      |
|                                                               | (3.0) <sup>d</sup>   |                      | (0.2) <sup>d</sup>   |                      | (0.8) <sup>d</sup>   |                      | (4.9) <sup>d</sup>   |                      | (1.2) <sup>d</sup>   |                      | (0.3) <sup>d</sup>   |                      |

<sup>e</sup> From X-ray crystallography, Ref. 20.

**Table SI-2.** LC- $\omega$ PBE/6-311+G\*\*, LC-BLYP/6-311+G\*\*(a) and MP2/6-311+G\*\*(b) calculated zero-point energies (ZPE), corrected electronic energies ( $E_o$ ), thermodynamic functions ( $H$ ,  $G$  in hartree,  $S$  in: cal mol<sup>-1</sup>K<sup>-1</sup>) and parameters [ $\Delta ZPE$ ,  $\Delta E_o$ ,  $\Delta H$ ,  $\Delta G$  (in: kcal mol<sup>-1</sup>)] and  $\Delta S$  (in: cal mol<sup>-1</sup>K<sup>-1</sup>) at 25 °C and 1 atm pressure for the axial and equatorial conformations of compounds **1-6**.

|             | $H$                         | $S$                   | $G$                         | $ZPE$                   | $E_o$                       | $\Delta H$            | $\Delta S$           | $\Delta G$          | $\Delta ZPE$        | $\Delta E_o$          |
|-------------|-----------------------------|-----------------------|-----------------------------|-------------------------|-----------------------------|-----------------------|----------------------|---------------------|---------------------|-----------------------|
| <b>1-ax</b> | -363.714233                 | 82.483                | -363.753423                 | 0.147672                | -363.722205                 | 0.00                  | 0.000                | 0.00                | 0.18                | 0.00                  |
|             | (-362.957805) <sup>a</sup>  | (82.053) <sup>a</sup> | (-362.996791) <sup>a</sup>  | (0.148758) <sup>a</sup> | (-362.965675) <sup>a</sup>  | (0.00) <sup>a</sup>   | (0.000) <sup>a</sup> | (0.00) <sup>a</sup> | (0.18) <sup>a</sup> | (0.00) <sup>a</sup>   |
|             | (-362.914739) <sup>b</sup>  | (82.928) <sup>b</sup> | (-362.954141) <sup>b</sup>  | (0.146110) <sup>b</sup> | (-362.922814) <sup>b</sup>  | (0.00) <sup>b</sup>   | (0.000) <sup>b</sup> | (0.00) <sup>b</sup> | (0.18) <sup>b</sup> | (0.00) <sup>b</sup>   |
| <b>1-eq</b> | -363.712609                 | 82.754                | -363.751928                 | 0.147378                | -363.720626                 | 1.02                  | 0.271                | 0.94                | 0.00                | 0.99                  |
|             | (-362.956454) <sup>a</sup>  | (82.311) <sup>a</sup> | (-362.995563) <sup>a</sup>  | (0.148475) <sup>a</sup> | (-362.964366) <sup>a</sup>  | (0.85) <sup>a</sup>   | (0.258) <sup>a</sup> | (0.77) <sup>a</sup> | (0.00) <sup>a</sup> | (0.82) <sup>a</sup>   |
|             | (-362.912804) <sup>b</sup>  | (83.209) <sup>b</sup> | (-362.952340) <sup>b</sup>  | (0.145826) <sup>b</sup> | (-362.920925) <sup>b</sup>  | (1.21) <sup>b</sup>   | (0.281) <sup>b</sup> | (1.13) <sup>b</sup> | (0.00) <sup>b</sup> | (1.18) <sup>b</sup>   |
| <b>2-ax</b> | -686.613462                 | 85.571                | -686.654120                 | 0.144436                | -686.621945                 | 0.00                  | 0.000                | 0.00                | 0.10                | 0.00                  |
|             | (-685.811575) <sup>a</sup>  | (85.124) <sup>a</sup> | (-685.852020) <sup>a</sup>  | (0.145439) <sup>a</sup> | (-685.819954) <sup>a</sup>  | (0.00) <sup>a</sup>   | (0.000) <sup>a</sup> | (0.00) <sup>a</sup> | (0.11) <sup>a</sup> | (0.00) <sup>(a)</sup> |
|             | (-685.525245) <sup>b</sup>  | (86.056) <sup>b</sup> | (-685.566133) <sup>b</sup>  | (0.142747) <sup>b</sup> | (-685.533848) <sup>b</sup>  | (0.00) <sup>b</sup>   | (0.000) <sup>b</sup> | (0.00) <sup>b</sup> | (0.13) <sup>b</sup> | (0.00) <sup>b</sup>   |
| <b>2-eq</b> | -686.611058                 | 86.005                | -686.651922                 | 0.144272                | -686.619609                 | 1.52                  | 0.434                | 1.38                | 0.00                | 1.47                  |
|             | (-685.809330) <sup>a</sup>  | (85.554) <sup>a</sup> | (-685.849979) <sup>a</sup>  | (0.145265) <sup>a</sup> | (-685.817778) <sup>a</sup>  | (1.41) <sup>a</sup>   | (0.43) <sup>a</sup>  | (1.28) <sup>a</sup> | (0.00) <sup>a</sup> | (1.37) <sup>a</sup>   |
|             | (-685.522452) <sup>b</sup>  | (86.563) <sup>b</sup> | (-685.563581) <sup>b</sup>  | (0.142544) <sup>b</sup> | (-685.531129) <sup>b</sup>  | (1.75) <sup>b</sup>   | (0.510) <sup>b</sup> | (1.60) <sup>b</sup> | (0.00) <sup>b</sup> | (1.71) <sup>b</sup>   |
| <b>3-ax</b> | -2689.714633                | 88.809                | -2689.756831                | 0.143163                | -2689.723471                | 0.00                  | 0.000                | 0.00                | 0.10                | 0.00                  |
|             | (-2689.001582) <sup>a</sup> | (88.338) <sup>a</sup> | (-2689.043554) <sup>a</sup> | (0.144173) <sup>a</sup> | (-2689.010313) <sup>a</sup> | (0.00) <sup>a</sup>   | (0.000) <sup>a</sup> | (0.00) <sup>a</sup> | (0.10) <sup>a</sup> | (0.00) <sup>a</sup>   |
|             | (-2687.775548) <sup>b</sup> | (89.343) <sup>b</sup> | (-2687.817997) <sup>b</sup> | (0.141270) <sup>b</sup> | (-2687.784525) <sup>b</sup> | (0.00) <sup>b</sup>   | (0.000) <sup>b</sup> | (0.00) <sup>b</sup> | (0.14) <sup>b</sup> | (0.00) <sup>b</sup>   |
| <b>3-eq</b> | -2689.712719                | 89.255                | -2689.755130                | 0.142983                | -2689.721629                | 1.18                  | 0.446                | 1.05                | 0.00                | 1.14                  |
|             | (-2688.999797) <sup>a</sup> | (88.766) <sup>a</sup> | (-2689.041972) <sup>a</sup> | (0.144009) <sup>a</sup> | (-2689.008596) <sup>a</sup> | (1.12) <sup>a</sup>   | (0.428) <sup>a</sup> | (0.99) <sup>a</sup> | (0.00) <sup>a</sup> | (1.08) <sup>a</sup>   |
|             | (-2687.773076) <sup>b</sup> | (89.957) <sup>b</sup> | (-2687.815817) <sup>b</sup> | (0.141048) <sup>b</sup> | (-2687.782142) <sup>b</sup> | (1.55) <sup>b</sup>   | (0.614) <sup>b</sup> | (1.37) <sup>b</sup> | (0.00) <sup>b</sup> | (1.49) <sup>b</sup>   |
| <b>4-ax</b> | -363.686485                 | 82.957                | -363.725904                 | 0.147332                | -363.694590                 | 0.00                  | 0.000                | 0.00                | 0.24                | 0.00                  |
|             | (-362.932410) <sup>a</sup>  | (82.501) <sup>a</sup> | (-362.971609) <sup>a</sup>  | (0.148404) <sup>a</sup> | (-362.940409) <sup>a</sup>  | (0.00) <sup>a</sup>   | (0.000) <sup>a</sup> | (0.00) <sup>a</sup> | (0.23) <sup>a</sup> | (0.00) <sup>a</sup>   |
|             | (-362.881703) <sup>b</sup>  | (83.433) <sup>b</sup> | (-362.921345) <sup>b</sup>  | (0.146182) <sup>b</sup> | (-362.889897) <sup>b</sup>  | (0.00) <sup>b</sup>   | (0.000) <sup>b</sup> | (0.00) <sup>b</sup> | (0.26) <sup>b</sup> | (0.00) <sup>b</sup>   |
| <b>4-eq</b> | -363.683530                 | 83.299                | -363.723113                 | 0.146942                | -363.691699                 | 1.87                  | 0.342                | 1.77                | 0.00                | 1.83                  |
|             | (-362.929546) <sup>a</sup>  | (82.810) <sup>a</sup> | (-362.968892) <sup>a</sup>  | (0.148036) <sup>a</sup> | (-362.937602) <sup>a</sup>  | (1.80) <sup>(a)</sup> | (0.309) <sup>a</sup> | (1.70) <sup>a</sup> | (0.00) <sup>a</sup> | (1.76) <sup>a</sup>   |
|             | (-362.878130) <sup>b</sup>  | (83.781) <sup>b</sup> | (-362.917937) <sup>b</sup>  | (0.145772) <sup>b</sup> | (-362.886388) <sup>b</sup>  | (2.24) <sup>b</sup>   | (0.348) <sup>b</sup> | (2.14) <sup>b</sup> | (0.00) <sup>b</sup> | (2.20) <sup>b</sup>   |
| <b>5-ax</b> | -686.579949                 | 86.007                | -686.620814                 | 0.143995                | -686.588564                 | 0.00                  | 0.000                | 0.00                | 0.13                | 0.00                  |
|             | (-685.780602) <sup>a</sup>  | (85.537) <sup>a</sup> | (-685.821244) <sup>a</sup>  | (0.144982) <sup>a</sup> | (-685.789111) <sup>a</sup>  | (0.00) <sup>a</sup>   | (0.000) <sup>a</sup> | (0.00) <sup>a</sup> | (0.14) <sup>a</sup> | (0.00) <sup>a</sup>   |



Table SI-2 continued...

|                    |                             |                         |                             |                         |                             |                     |                      |                     |                     |                     |
|--------------------|-----------------------------|-------------------------|-----------------------------|-------------------------|-----------------------------|---------------------|----------------------|---------------------|---------------------|---------------------|
| <b>5-<i>eq</i></b> | (-685.486519) <sup>b</sup>  | (86.337) <sup>b</sup>   | (-685.527540) <sup>b</sup>  | (0.142716) <sup>b</sup> | (-685.495214) <sup>b</sup>  | (0.00) <sup>b</sup> | (0.000) <sup>b</sup> | (0.00) <sup>b</sup> | (0.19) <sup>b</sup> | (0.00) <sup>b</sup> |
|                    | -686.576874                 | 86.503                  | -686.617975                 | 0.143781                | -686.585575                 | 1.930               | 0.496                | 1.78                | 0.00                | 1.88                |
|                    | (-685.777704) <sup>a</sup>  | (86.024) <sup>a</sup>   | (-685.818577) <sup>a</sup>  | (0.144764) <sup>a</sup> | (-685.786297) <sup>a</sup>  | (1.82) <sup>a</sup> | (0.487) <sup>a</sup> | (1.67) <sup>a</sup> | (0.00) <sup>a</sup> | (1.77) <sup>a</sup> |
|                    | (-685.482587) <sup>b</sup>  | (87.103) <sup>b</sup>   | (-685.523972) <sup>b</sup>  | (0.142407) <sup>b</sup> | (-685.491404) <sup>b</sup>  | (2.47) <sup>b</sup> | (0.766) <sup>b</sup> | (2.24) <sup>b</sup> | (0.00) <sup>b</sup> | (2.39) <sup>b</sup> |
| <b>6-<i>ax</i></b> | -2689.679948                | 89.235                  | -2689.722351                | 0.142728                | -2689.688920                | 0.00                | 0.000                | 0.00                | 0.14                | 0.00                |
|                    | (-2688.969475) <sup>a</sup> | (88.753) <sup>a</sup>   | (-2689.011644) <sup>a</sup> | (0.143713) <sup>a</sup> | (-2688.978339) <sup>a</sup> | (0.00) <sup>a</sup> | (0.000) <sup>a</sup> | (0.00) <sup>a</sup> | (0.13) <sup>a</sup> | (0.00) <sup>a</sup> |
|                    | (-2687.735645) <sup>b</sup> | (89.650) <sup>b</sup>   | (-2687.778240) <sup>b</sup> | (0.141206) <sup>b</sup> | (-2687.744723) <sup>b</sup> | (0.00) <sup>b</sup> | (0.000) <sup>b</sup> | (0.00) <sup>b</sup> | (0.20) <sup>b</sup> | (0.00) <sup>b</sup> |
| <b>6-<i>eq</i></b> | -2689.677757                | 89.737                  | -2689.720399                | 0.142499                | -2689.686817                | 1.37                | 0.502                | 1.22                | 0.00                | 1.31                |
|                    | (-2688.967409) <sup>a</sup> | (89.217) <sup>(a)</sup> | (-2689.009799) <sup>a</sup> | (0.143499) <sup>a</sup> | (-2688.976355) <sup>a</sup> | (1.30) <sup>a</sup> | (0.464) <sup>a</sup> | (1.16) <sup>a</sup> | (0.00) <sup>a</sup> | (1.24) <sup>a</sup> |
|                    | (-2687.732451) <sup>b</sup> | (90.497) <sup>b</sup>   | (-2687.775449) <sup>b</sup> | (0.140879) <sup>b</sup> | (-2687.741660) <sup>b</sup> | (2.00) <sup>b</sup> | (0.847) <sup>b</sup> | (1.75) <sup>b</sup> | (0.00) <sup>b</sup> | (1.92) <sup>b</sup> |

**Table SI-3.** B3LYP/6-311+G\*\* and M06-2X/6-311+G\*\*(a) calculated thermodynamic functions and parameters [ $H$ ,  $G$  (in hartree),  $\Delta H$ ,  $\Delta G$  (in kcal mol<sup>-1</sup>),  $S$  and  $\Delta S$  (in cal mol<sup>-1</sup>K<sup>-1</sup>)] at 25 °C and 1 atm pressure for the axial and equatorial conformations of compounds **1-3** and **4-6**.

|             | $H$                                         | $S$                             | $G$                                         | $ZPE$                               | $E_o$                                       | $\Delta H$                  | $\Delta S$                    | $\Delta G$                  | $\Delta ZPE$                | $\Delta E_o$                |
|-------------|---------------------------------------------|---------------------------------|---------------------------------------------|-------------------------------------|---------------------------------------------|-----------------------------|-------------------------------|-----------------------------|-----------------------------|-----------------------------|
| <b>1-ax</b> | -363.957505<br>(-363.801060) <sup>a</sup>   | 83.104<br>(82.53) <sup>a</sup>  | -363.996990<br>(-363.840274) <sup>a</sup>   | 0.144451<br>(0.146295) <sup>a</sup> | -363.965624<br>(-363.809052) <sup>a</sup>   | 0.00<br>(0.00) <sup>a</sup> | 0.000<br>(0.00) <sup>a</sup>  | 0.00<br>(0.00) <sup>a</sup> | 0.19<br>(0.17) <sup>a</sup> | 0.00<br>(0.00) <sup>a</sup> |
| <b>1-eq</b> | -363.956694<br>(-363.798576) <sup>a</sup>   | 83.278<br>(82.803) <sup>a</sup> | -363.996262<br>(-363.837919) <sup>a</sup>   | 0.144143<br>(0.146030) <sup>a</sup> | -363.964841<br>(-363.806614) <sup>a</sup>   | 0.51<br>(1.56) <sup>a</sup> | 0.174<br>(0.27) <sup>a</sup>  | 0.46<br>(1.48) <sup>a</sup> | 0.00<br>(0.00) <sup>a</sup> | 0.49<br>(1.53) <sup>a</sup> |
| <b>2-ax</b> | -686.944965<br>(-686.783607) <sup>a</sup>   | 86.451<br>(85.724) <sup>a</sup> | -686.986041<br>(-686.824337) <sup>a</sup>   | 0.141116<br>(0.142581) <sup>a</sup> | -686.953653<br>(-686.792157) <sup>a</sup>   | 0.00<br>(0.00) <sup>a</sup> | 0.000<br>(0.000) <sup>a</sup> | 0.00<br>(0.00) <sup>a</sup> | 0.09<br>(0.03) <sup>a</sup> | 0.00<br>(0.00) <sup>a</sup> |
| <b>2-eq</b> | -686.943457<br>(-686.780431) <sup>a</sup>   | 86.737<br>(86.222) <sup>a</sup> | -686.984669<br>(-686.821398) <sup>a</sup>   | 0.140977<br>(0.142541) <sup>a</sup> | -686.952193<br>(-686.789051) <sup>a</sup>   | 0.95<br>(1.99) <sup>a</sup> | 0.286<br>(0.498) <sup>a</sup> | 0.86<br>(1.84) <sup>a</sup> | 0.00<br>(0.00) <sup>a</sup> | 0.92<br>(1.95) <sup>a</sup> |
| <b>3-ax</b> | -2690.278766<br>(-2690.150407) <sup>a</sup> | 89.826<br>(88.915) <sup>a</sup> | -2690.321445<br>(-2690.192654) <sup>a</sup> | 0.139848<br>(0.141381) <sup>a</sup> | -0.287834269<br>(-2690.159306) <sup>a</sup> | 0.00<br>(0.00) <sup>a</sup> | 0.000<br>(0.000) <sup>a</sup> | 0.00<br>(0.00) <sup>a</sup> | 0.07<br>(0.05) <sup>a</sup> | 0.00<br>(0.00) <sup>a</sup> |
| <b>3-eq</b> | -2690.277820<br>(-2690.147626) <sup>a</sup> | 90.080<br>(89.379) <sup>a</sup> | -2690.320620<br>(-2690.190092) <sup>a</sup> | 0.139739<br>(0.141457) <sup>a</sup> | -2690.286931<br>(-2690.156584) <sup>a</sup> | 0.59<br>(0.00) <sup>a</sup> | 0.254<br>(0.464) <sup>a</sup> | 0.52<br>(1.61) <sup>a</sup> | 0.00<br>(0.00) <sup>a</sup> | 0.57<br>(1.71) <sup>a</sup> |
| <b>4-ax</b> | -363.929465<br>(-363.776149) <sup>a</sup>   | 83.774<br>(82.939) <sup>a</sup> | -363.969268<br>(-363.815555) <sup>a</sup>   | 0.144093<br>(0.145990) <sup>a</sup> | -363.937745<br>(-363.784257) <sup>a</sup>   | 0.00<br>(0.00) <sup>a</sup> | 0.000<br>(0.000) <sup>a</sup> | 0.00<br>(0.00) <sup>a</sup> | 0.24<br>(0.19) <sup>a</sup> | 0.00<br>(0.00) <sup>a</sup> |
| <b>4-eq</b> | -363.927349<br>(-363.772272) <sup>a</sup>   | 83.963<br>(83.176) <sup>a</sup> | -363.967243<br>(-363.811792) <sup>a</sup>   | 0.143709<br>(0.145679) <sup>a</sup> | -363.935667<br>(-363.780427) <sup>a</sup>   | 1.33<br>(2.43) <sup>a</sup> | 0.189<br>(0.237) <sup>a</sup> | 1.27<br>(2.36) <sup>a</sup> | 0.00<br>(0.00) <sup>a</sup> | 1.30<br>(2.40) <sup>a</sup> |
| <b>5-ax</b> | -686.911635<br>(-686.752970) <sup>a</sup>   | 87.084<br>(86.085) <sup>a</sup> | -686.953011<br>(-686.793872) <sup>a</sup>   | 0.140614<br>(0.142247) <sup>a</sup> | -686.920484<br>(-686.761631) <sup>a</sup>   | 0.00<br>(0.00) <sup>a</sup> | 0.000<br>(0.000) <sup>a</sup> | 0.00<br>(0.00) <sup>a</sup> | 0.09<br>(0.08) <sup>a</sup> | 0.00<br>(0.00) <sup>a</sup> |
| <b>5-eq</b> | -686.909684<br>(-686.749345) <sup>a</sup>   | 87.334<br>(86.590) <sup>a</sup> | -686.951179<br>(-686.790486) <sup>a</sup>   | 0.140472<br>(0.142121) <sup>a</sup> | -686.918583<br>(-686.758087) <sup>a</sup>   | 1.22<br>(2.27) <sup>a</sup> | 0.250<br>(0.500) <sup>a</sup> | 1.15<br>(2.12) <sup>a</sup> | 0.00<br>(0.00) <sup>a</sup> | 1.19<br>(2.22) <sup>a</sup> |

*Table SI-3 continued...*

---

|             |                             |                       |                             |                        |                             |                     |                      |                     |                     |                     |
|-------------|-----------------------------|-----------------------|-----------------------------|------------------------|-----------------------------|---------------------|----------------------|---------------------|---------------------|---------------------|
| <b>6-ax</b> | -2690.244385                | 90.315                | -2690.287297                | 0.139427               | -2690.253592                | 0.00                | 0.000                | 0.00                | 0.12                | 0.00                |
|             | (-2690.118720) <sup>a</sup> | (89.583) <sup>a</sup> | (-2690.161283) <sup>a</sup> | 0.140910) <sup>a</sup> | (-2690.127776) <sup>a</sup> | (0.00) <sup>a</sup> | (0.000) <sup>a</sup> | (0.00) <sup>a</sup> | (0.09) <sup>a</sup> | (0.00) <sup>a</sup> |
| <b>6-eq</b> | -2690.243304                | 90.640                | -2690.286370                | 0.139229               | -2690.25258                 | 0.68                | 0.325                | 0.58                | 0.00                | 0.64                |
|             | (-2690.115761) <sup>a</sup> | (89.741) <sup>a</sup> | (-2690.158400) <sup>a</sup> | 0.141044) <sup>a</sup> | (-2690.124841) <sup>a</sup> | (1.86) <sup>a</sup> | (0.160) <sup>a</sup> | (1.81) <sup>a</sup> | (0.00) <sup>a</sup> | (1.84) <sup>a</sup> |

---

**Table SI-4.** B3LYP/6-311+G\*\* and M06-2X/6-311+G\*\*(a) calculated energies (in hartree) of HOMO ( $\varepsilon_{\text{HOMO}}$ ), LUMO ( $\varepsilon_{\text{LUMO}}$ ),  $\varepsilon_{\text{LUMO}} - \varepsilon_{\text{HOMO}}$  and global hardness ( $\eta$ ) for the axial and equatorial conformations of compounds **1-6**.

|             | $\varepsilon_{\text{HOMO}}$         | $\varepsilon_{\text{LUMO}}$         | $\varepsilon_{\text{LUMO}} - \varepsilon_{\text{HOMO}}$ | $I$                               | $A$                                | $\eta$                              | $\Delta\eta$                                                              |
|-------------|-------------------------------------|-------------------------------------|---------------------------------------------------------|-----------------------------------|------------------------------------|-------------------------------------|---------------------------------------------------------------------------|
| <b>1-ax</b> | -0.28735<br>(-0.35042) <sup>a</sup> | -0.01081<br>(0.00446) <sup>a</sup>  | 0.27654<br>(0.35488) <sup>a</sup>                       | 0.28735<br>(0.35042) <sup>a</sup> | 0.01081<br>(-0.00446) <sup>a</sup> | 0.13827<br>(0.17744) <sup>a</sup>   | 0.00192(1.20) <sup>b</sup><br>(0.00218) <sup>a</sup> (1.37) <sup>b</sup>  |
| <b>1-eq</b> | -0.28437<br>(-0.34768) <sup>a</sup> | -0.01166<br>(0.00284) <sup>a</sup>  | 0.27271<br>(0.35052) <sup>a</sup>                       | 0.28437<br>(0.34768) <sup>a</sup> | 0.01166<br>(-0.00284) <sup>a</sup> | 0.13636<br>(0.17526) <sup>a</sup>   | 0.00000<br>(0.00000) <sup>a</sup>                                         |
| <b>2-ax</b> | -0.24717<br>(-0.29847) <sup>a</sup> | -0.01661<br>(0.00377) <sup>a</sup>  | 0.23056<br>(0.30224) <sup>a</sup>                       | 0.24717<br>(0.29847) <sup>a</sup> | 0.01661<br>(-0.00377) <sup>a</sup> | 0.11528<br>(0.15112) <sup>a</sup>   | 0.00122(0.77) <sup>b</sup><br>(0.00189) <sup>a</sup> (1.19) <sup>b</sup>  |
| <b>2-eq</b> | -0.24655<br>(-0.29830) <sup>a</sup> | -0.01356<br>(0.00015) <sup>a</sup>  | 0.23299<br>(0.29845) <sup>a</sup>                       | 0.24655<br>(0.29830) <sup>a</sup> | 0.01356<br>(-0.00015) <sup>a</sup> | 0.116495<br>(0.14923) <sup>a</sup>  | 0.00000<br>(0.00000) <sup>a</sup>                                         |
| <b>3-ax</b> | -0.23519<br>(-0.28414) <sup>a</sup> | -0.03593<br>(-0.00329) <sup>a</sup> | 0.19926<br>(0.28085) <sup>a</sup>                       | 0.23519<br>(0.28414) <sup>a</sup> | 0.03593<br>(0.00329) <sup>a</sup>  | 0.09963<br>(0.140425) <sup>a</sup>  | 0.00108(0.68) <sup>b</sup><br>-0.00020 <sup>a</sup> (-0.131) <sup>b</sup> |
| <b>3-eq</b> | -0.23514<br>(-0.28462) <sup>a</sup> | -0.03373<br>(-0.00373) <sup>a</sup> | 0.20141<br>(0.28089) <sup>a</sup>                       | 0.23514<br>(0.28462) <sup>a</sup> | 0.03373<br>(0.00373) <sup>a</sup>  | 0.100705<br>(0.140445) <sup>a</sup> | 0.00000<br>(0.00000) <sup>a</sup>                                         |
| <b>4-ax</b> | -0.28930<br>(-0.35128) <sup>a</sup> | -0.01047<br>(0.00480) <sup>a</sup>  | 0.27883<br>(0.35608) <sup>a</sup>                       | 0.28930<br>(0.35128) <sup>a</sup> | 0.01047<br>(-0.0048) <sup>a</sup>  | 0.139415<br>(0.17804) <sup>a</sup>  | 0.00324(2.03) <sup>b</sup><br>0.00313 <sup>a</sup> (1.96) <sup>b</sup>    |
| <b>4-eq</b> | -0.28288<br>(-0.34568) <sup>a</sup> | -0.01053<br>(0.00413) <sup>a</sup>  | 0.27235<br>(0.34981) <sup>a</sup>                       | 0.28288<br>(0.34568) <sup>a</sup> | 0.01053<br>(-0.00413) <sup>a</sup> | 0.136175<br>(0.17491) <sup>a</sup>  | 0.00000<br>(0.00000) <sup>a</sup>                                         |
| <b>5-ax</b> | -0.24711<br>(-0.29845) <sup>a</sup> | -0.0136<br>(0.00391) <sup>a</sup>   | 0.23351<br>(0.30236) <sup>a</sup>                       | 0.24711<br>(0.29845) <sup>a</sup> | 0.0136<br>(-0.00391) <sup>a</sup>  | 0.11676<br>(0.15118) <sup>a</sup>   | 0.00166(1.04) <sup>b</sup><br>0.00236 <sup>a</sup> (1.48) <sup>b</sup>    |
| <b>5-eq</b> | -0.24461<br>(-0.29619) <sup>a</sup> | -0.01441<br>(0.00144) <sup>a</sup>  | 0.23020<br>(0.29763) <sup>a</sup>                       | 0.24461<br>(0.29619) <sup>a</sup> | 0.01441<br>(-0.00144) <sup>a</sup> | 0.11510<br>(0.14882) <sup>a</sup>   | 0.00000<br>(0.00000) <sup>a</sup>                                         |
| <b>6-ax</b> | -0.23419<br>(-0.28326) <sup>a</sup> | -0.03193<br>(-0.00107) <sup>a</sup> | 0.20226<br>(0.28219) <sup>a</sup>                       | 0.23419<br>(0.28326) <sup>a</sup> | 0.03193<br>(0.00107) <sup>a</sup>  | 0.10113<br>(0.14110) <sup>a</sup>   | 0.00106(0.67) <sup>b</sup><br>0.00162 <sup>a</sup> (1.02) <sup>b</sup>    |
| <b>6-eq</b> | -0.2329<br>(-0.28224) <sup>a</sup>  | -0.03279<br>(-0.00329) <sup>a</sup> | 0.20011<br>(0.27895) <sup>a</sup>                       | 0.2329<br>(0.28224) <sup>a</sup>  | 0.03279<br>(0.00329) <sup>a</sup>  | 0.100055<br>(0.13948) <sup>a</sup>  | 0.00000<br>(0.00000) <sup>a</sup>                                         |

<sup>b</sup> Values in kcal mol<sup>-1</sup>.
